# Supplementary material
Source: publisher site journal article supplement (https://www.degruyterbrill.com/publication/journal_key/MIM/downloadAsset/MIM_Submission%20checklist%20MIM.pdf)
Supplement: Supplementary file 1 [file MIM_Submission%20checklist%20MIM.pdf]

## SUBMISSION CHECKLIST

Before submitting your article to Methods in Microscopy (MiM), please read the [Instructions for Authors](#) and familiarise yourself with the journal's requirements and article processing charges.

Make sure you have the following documents ready for your submission:

- ☐ Complete manuscript:
  - ☐ A single PDF file, including tables and figures, structured into Introduction, Materials and Methods Section, Results, Discussion and Conclusion
  - ☐ Source code document (DOC/DOCX file for Microsoft Word documents or ZIP archive inc. TEX, CLS STY for LaTeX documents)
  - ☐ Your ORCID ID (Register: <https://orcid.org/register>)
  - ☐ Figures as separate graphical files (with a minimum resolution of 300 dpi)
  - ☐ Cover letter to the editor
  - ☐ Novelty and impact statement (250 words)
- ☐ Permission for the re-use of any graphics or figures, if applicable
- ☐ Ethical and legal declaration in a separate document (see [template](#))
- ☐ Signed [License to Publish](#)
- ☐ A minimum of 3 suggested reviewers, or reviewers to avoid

**READY TO SUBMIT?** <https://mc.manuscriptcentral.com/mim>
